# Supplementary material for: Quantification of Re and four other trace elements (Ag, Cd, Pd, Zn) in certified reference materials and natural waters
Source: Royal Society of Chemistry journal article supplement (doi:10.1039/d2ja00073c), 2022-01-01
Supplement: d2ja00073c1.pdf [file d2ja00073c1.pdf]

SUPPORTING INFORMATION FOR

**Quantification of Re and four other trace elements (Ag, Cd, Pd, Zn)**

**in certified reference materials and natural waters**

Wei Wang<sup>a</sup>, Lan Ma<sup>b</sup>, R. Douglas Evans<sup>a,c</sup>, Michael G. Babechuk<sup>d</sup>, Duc Huy Dang<sup>a,c,e\*</sup>

<sup>a</sup> School of the Environment, Trent University, Peterborough, Ontario, Canada

<sup>b</sup> School of Energy and Environment, State Key Laboratory of Marine Pollution, City University of Hong Kong, Kowloon, Hong Kong, China

<sup>c</sup> Water Quality Centre, Trent University, Peterborough, Ontario, Canada

<sup>d</sup> Department of Earth Sciences, Memorial University of Newfoundland, St. John's, Canada

<sup>e</sup> Chemistry Department, Trent University, 1600 West Bank Drive, Peterborough, Ontario, Canada K9L 0G2

\* Corresponding author: [huydang@trentu.ca](mailto:huydang@trentu.ca)

**Table S1:** Summary of the elution curve of 55 elements through 1 mL of the AmberChrom® 1-X8 resin, *i.e.*, column recovery of the elements during sample loading, washing and final elution (0.5 µg through 1mL of the resin, see section 2.3.1. for more details). Note that only La is shown as representative of the lanthanide series. Also, S and P were not measured although being present in the multi-element standard solution.

| Element | Column recovery (%) |         |         |
|---------|---------------------|---------|---------|
|         | Sample loading      | Washing | Elution |
| Li      | 95                  | 5       | 0       |
| Be      | 97                  | 2       | 1       |
| Mg      | 69                  | 14      | 17      |
| Al      | 82                  | 7       | 11      |
| Sc      | 92                  | 1       | 1       |
| V       | 93                  | 1       | 1       |
| Cr      | 82                  | 12      | 6       |
| Mn      | 82                  | 4       | 14      |
| Fe      | 44                  | 18      | 38      |
| Co      | 91                  | 1       | 2       |
| Ni      | 80                  | 14      | 6       |
| Cu      | 90                  | 2       | 8       |
| Zn      | 19                  | 3       | 92      |
| Ga      | 89                  | 2       | 2       |
| Ge      | 81                  | 2       | 0       |
| As      | 95                  | 3       | 1       |
| Se      | 97                  | 2       | 1       |
| Rb      | 92                  | 1       | 1       |
| Sr      | 93                  | 1       | 3       |
| Y       | 98                  | 1       | 1       |
| Zr      | 94                  | 1       | 2       |
| Nb      | 69                  | 2       | 6       |
| Mo      | 87                  | 8       | 5       |
| Ru      | 83                  | 3       | 14      |
| Rh      | 95                  | 3       | 2       |
| Pd      | 2                   | 0       | 86      |
| Ag      | 1                   | 0       | 99      |
| Cd      | 0                   | 0       | 95      |
| Sb      | 97                  | 1       | 2       |
| Te      | 94                  | 5       | 1       |
| Cs      | 98                  | 1       | 1       |
| Ba      | 96                  | 1       | 2       |
| La      | 98                  | 1       | 1       |
| Hf      | 98                  | 1       | 1       |
| Ta      | 59                  | 0       | 5       |
| W       | 35                  | 2       | 13      |
| Re      | 1                   | 0       | 99      |
| Os      | 1                   | 0       | 1       |
| Ir      | 78                  | 13      | 9       |
| Pt      | 2                   | 0       | 29      |
| Tl      | 39                  | 1       | 47      |
| Pb      | 78                  | 12      | 10      |
| U       | 95                  | 4       | 1       |

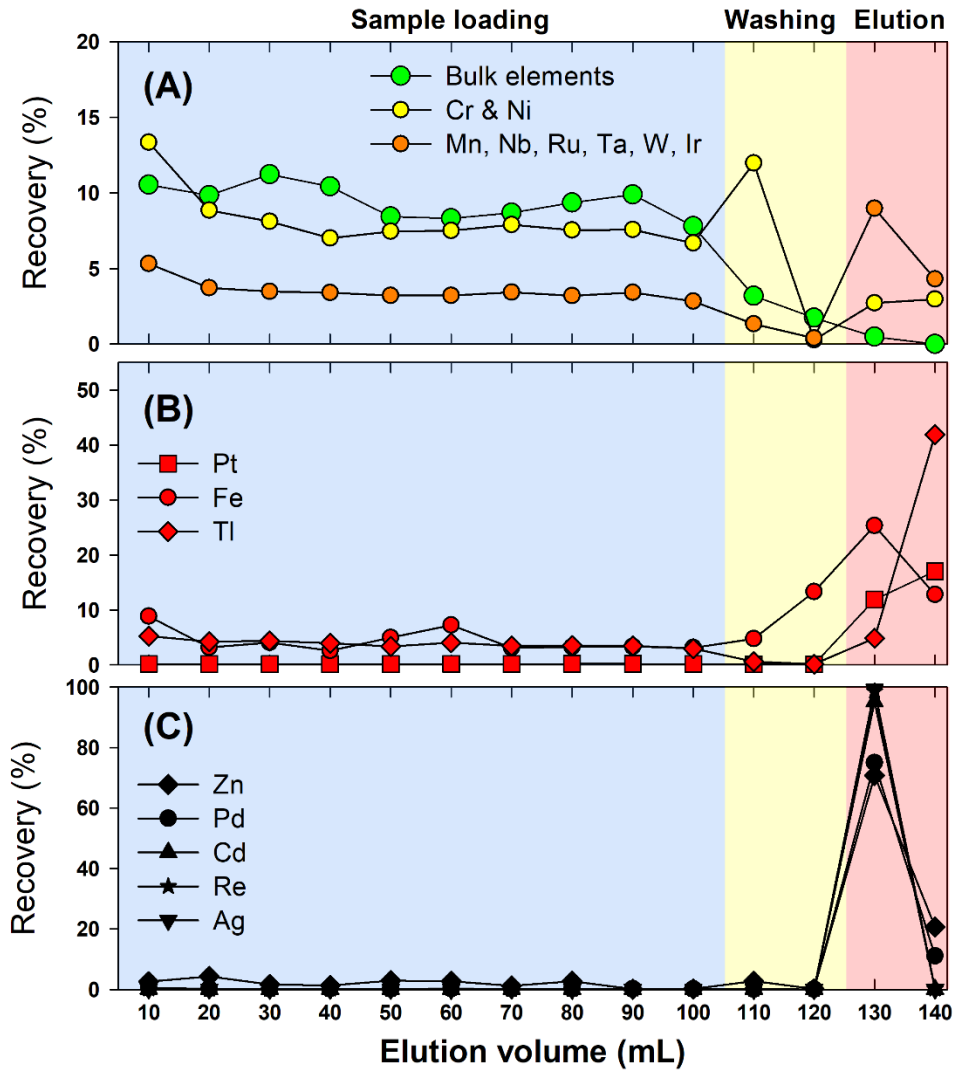

**Figure S1:** Elution curves of the elements for the 57-element column calibration test. Bulk elements are listed as green circles in **Figure 1**.
